# Supplementary material for: Silencing of lncRNA AFAP1-AS1 suppressed lung cancer development by regulatory mechanism in cis and trans
Source: PubMed Central journal article supplement (PMC5706822; doi:10.18632/oncotarget.20549), 2017-08-24
Supplement: oncotarget-08-93608-s001.pdf [file oncotarget-08-93608-s001.pdf]

## **Silencing of lncRNA AFAP1-AS1 suppressed lung cancer development by regulatory mechanism in *cis* and *trans***

### **SUPPLEMENTARY MATERIALS**

**Supplementary Table 1: 132 proteins identified to bind with AFAP1-AS1 by RNA Affinity Purification-Mass Spectrometry.**

**See Supplementary File 1**
